# Supplementary material for: A novel computational pipeline for var gene expression augments the discovery of changes in the Plasmodium falciparum transcriptome during transition from in vivo to short-term in vitro culture
Source: eLife journal article supplement (doi:10.7554/elife.87726), 2023-06-08

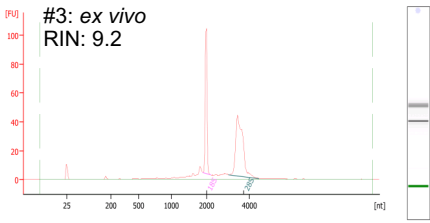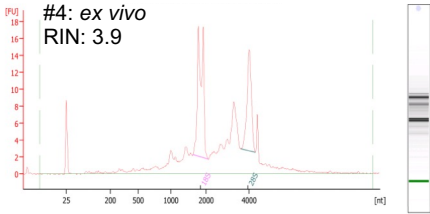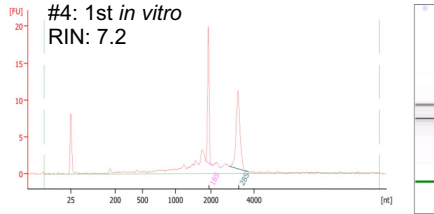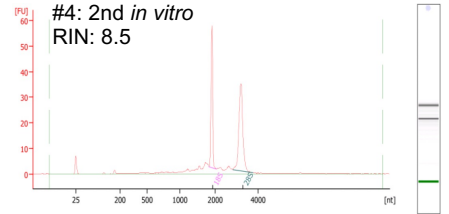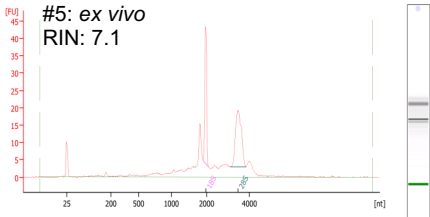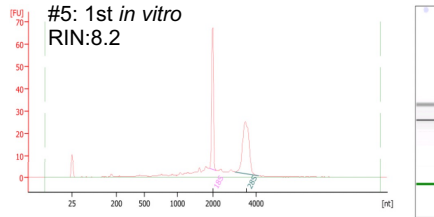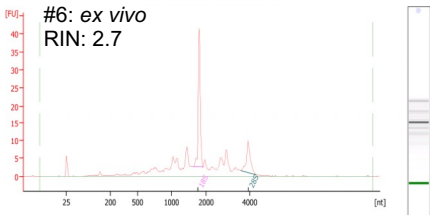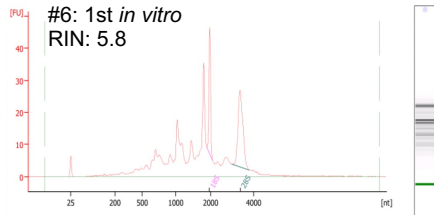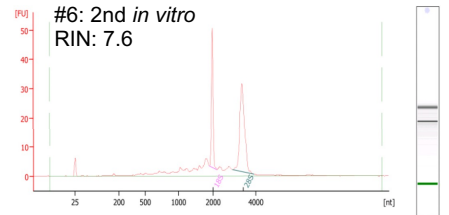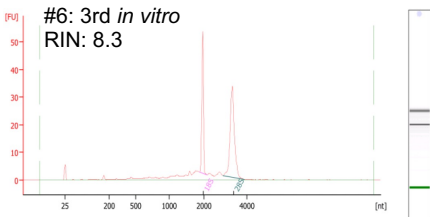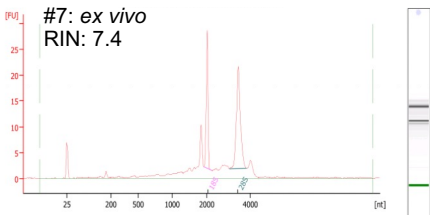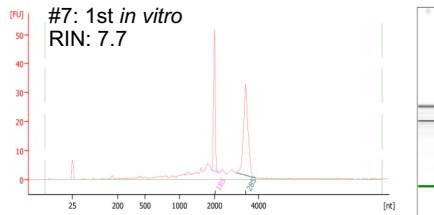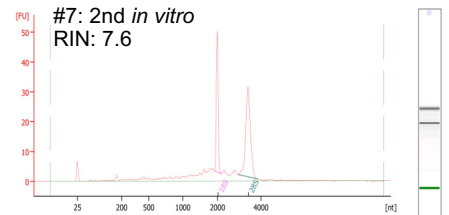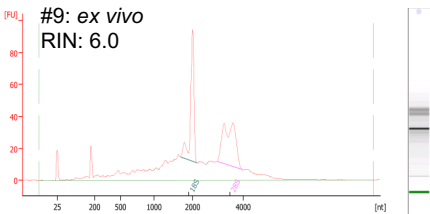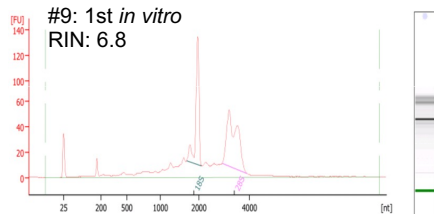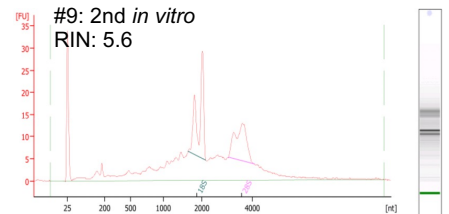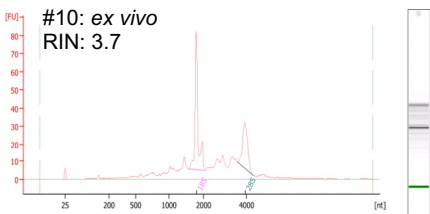

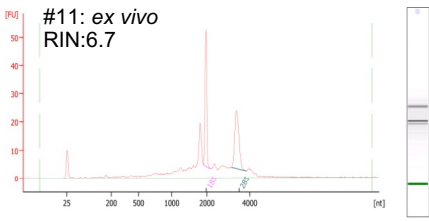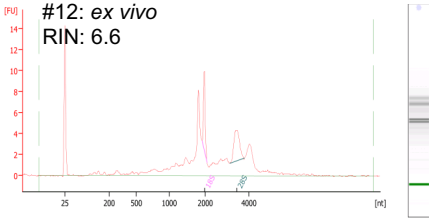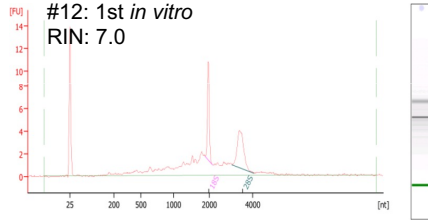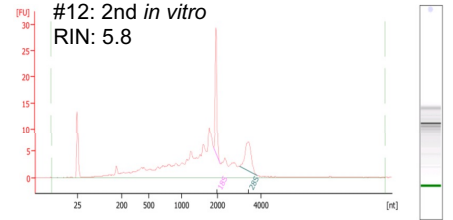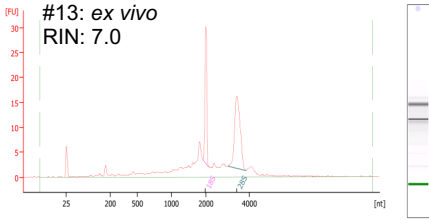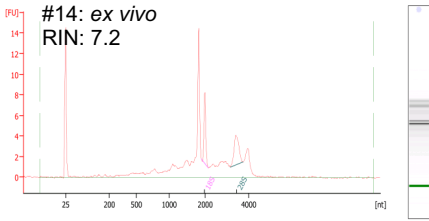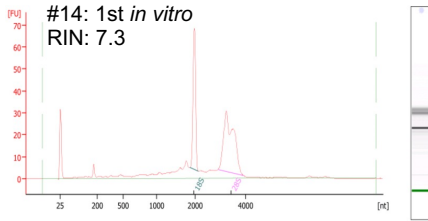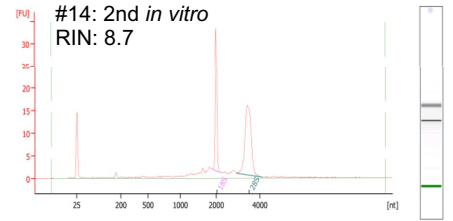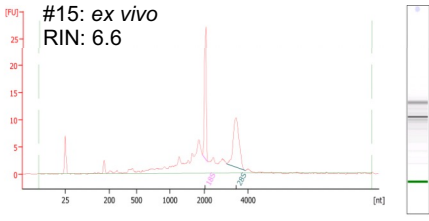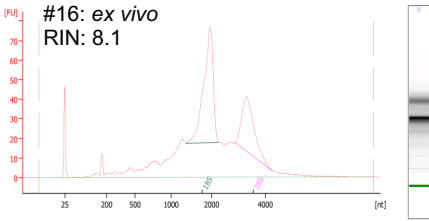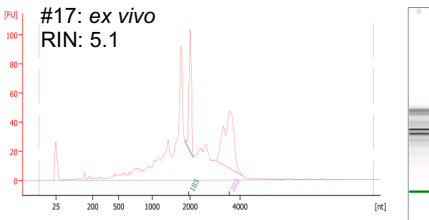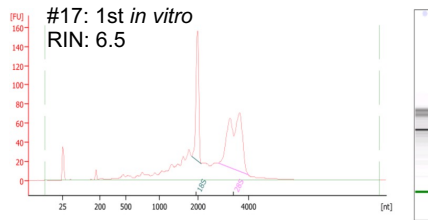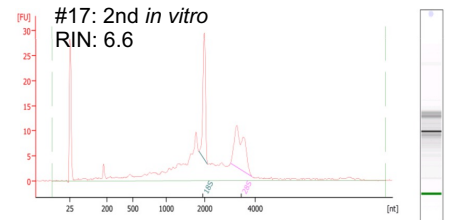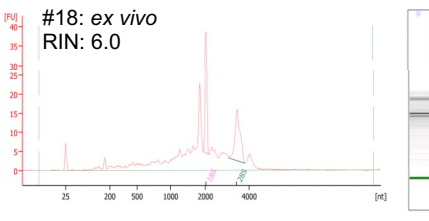

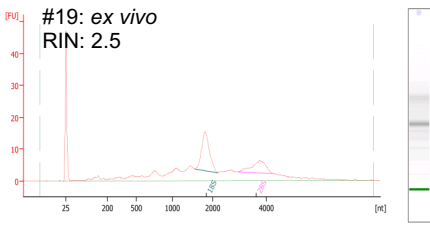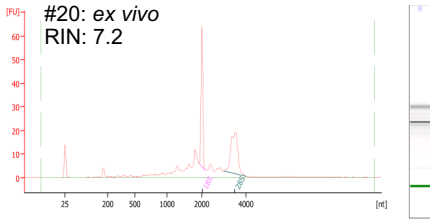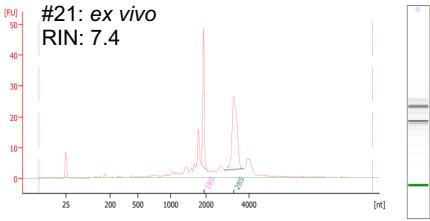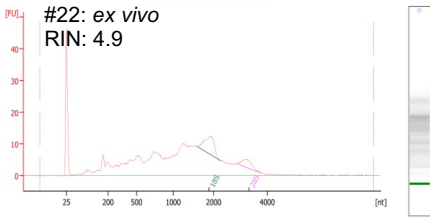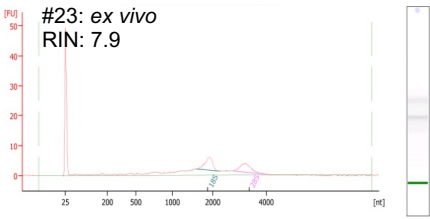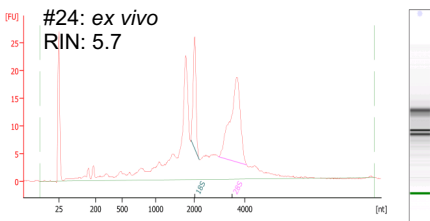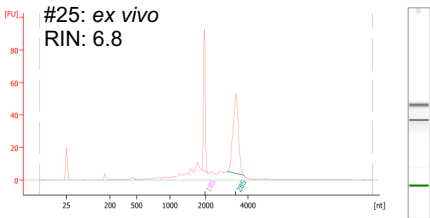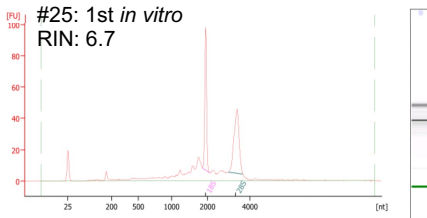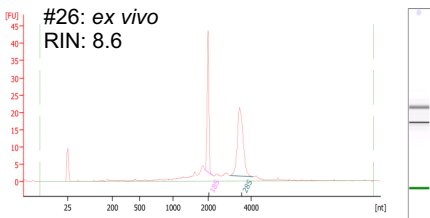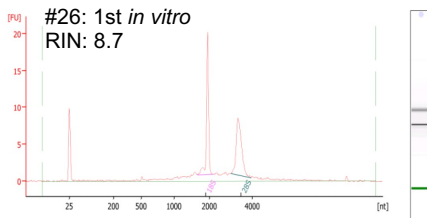

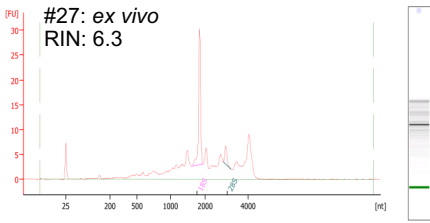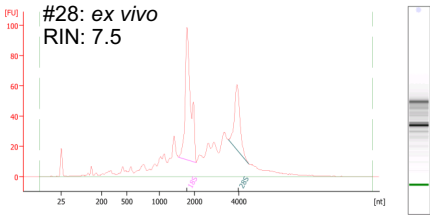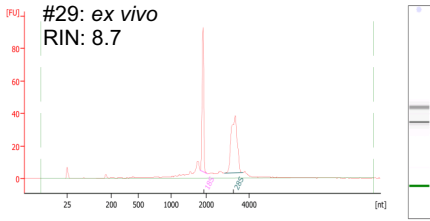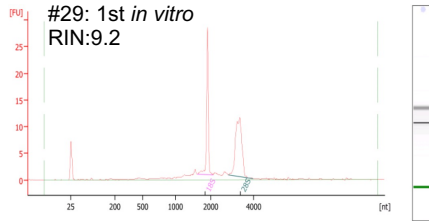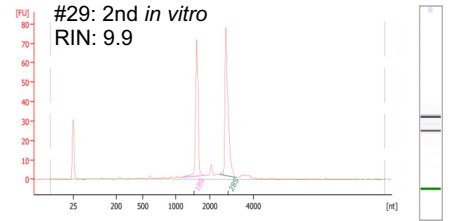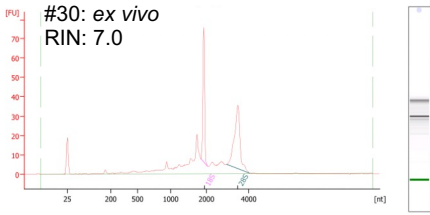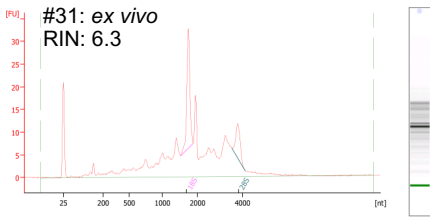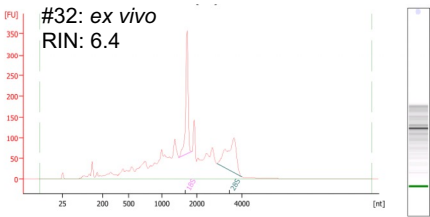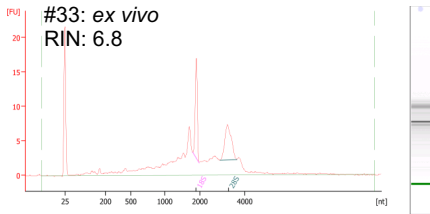

Supplement: supp9 [file elife-87726-supp9-v1.pdf]
